# Supplementary material for: Associations of baseline use of biologic or targeted synthetic DMARDs with COVID-19 severity in rheumatoid arthritis: Results from the COVID-19 Global Rheumatology Alliance physician registry
Source: HighWire-hosted journal article supplement (doi:10.1136/annrheumdis-2021-220418), 2021-05-28
Supplement: annrheumdis-2021-220418supp001_data_supplement.pdf [file annrheumdis-2021-220418supp001_data_supplement.pdf]

**Supplementary Material for “Associations of baseline use of biologic or targeted synthetic DMARDs with COVID-19 severity in rheumatoid arthritis: Results from the COVID-19 Global Rheumatology Alliance Physician Registry” by Sparks JA, Wallace ZS, et al.**

**Supplementary Figure 1: Love plot for abatacept vs. TNF inhibitors.**

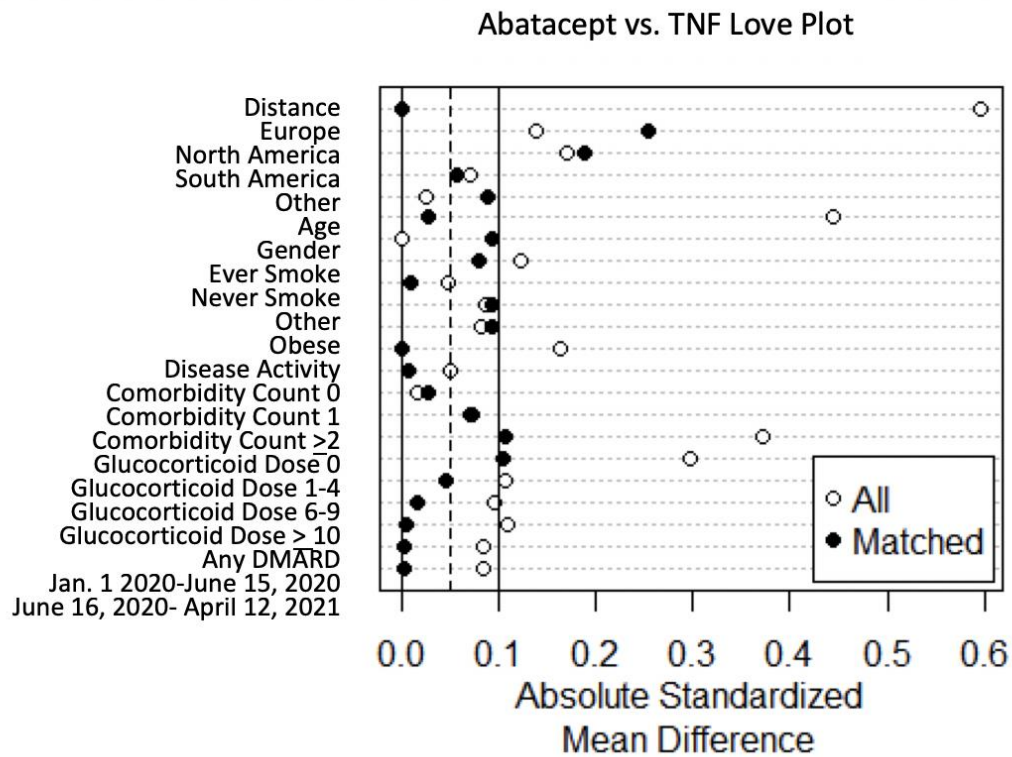

**Supplementary Figure 2:** Love plot for rituximab vs. TNF inhibitors.

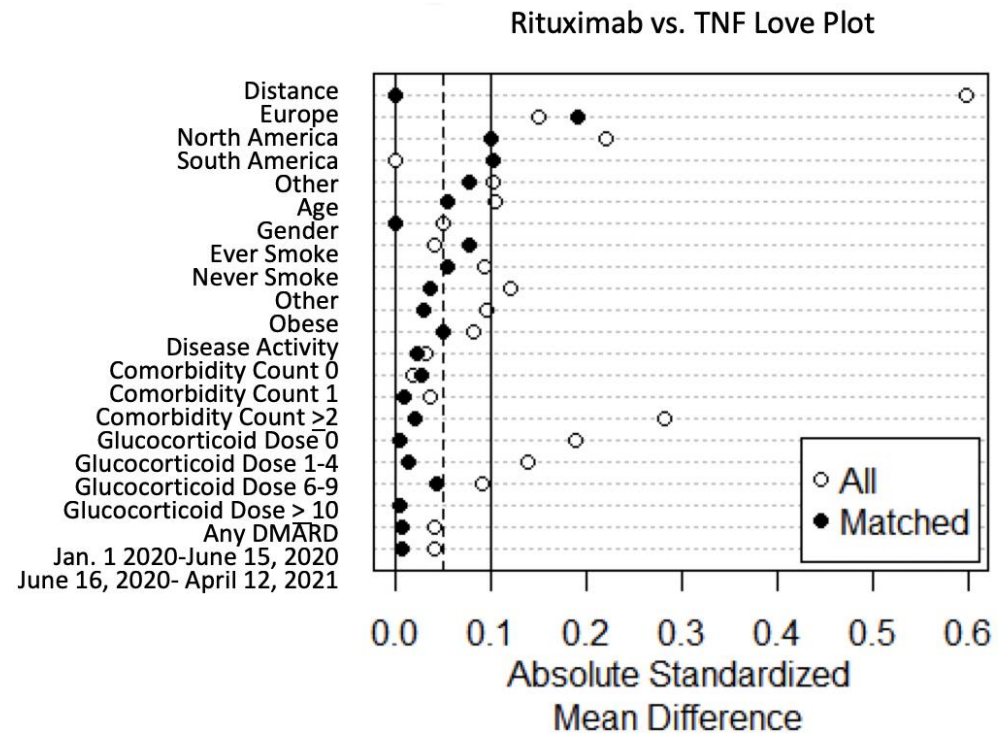

**Supplementary Figure 3:** Love plot for IL-6 inhibitors vs. TNF inhibitors.

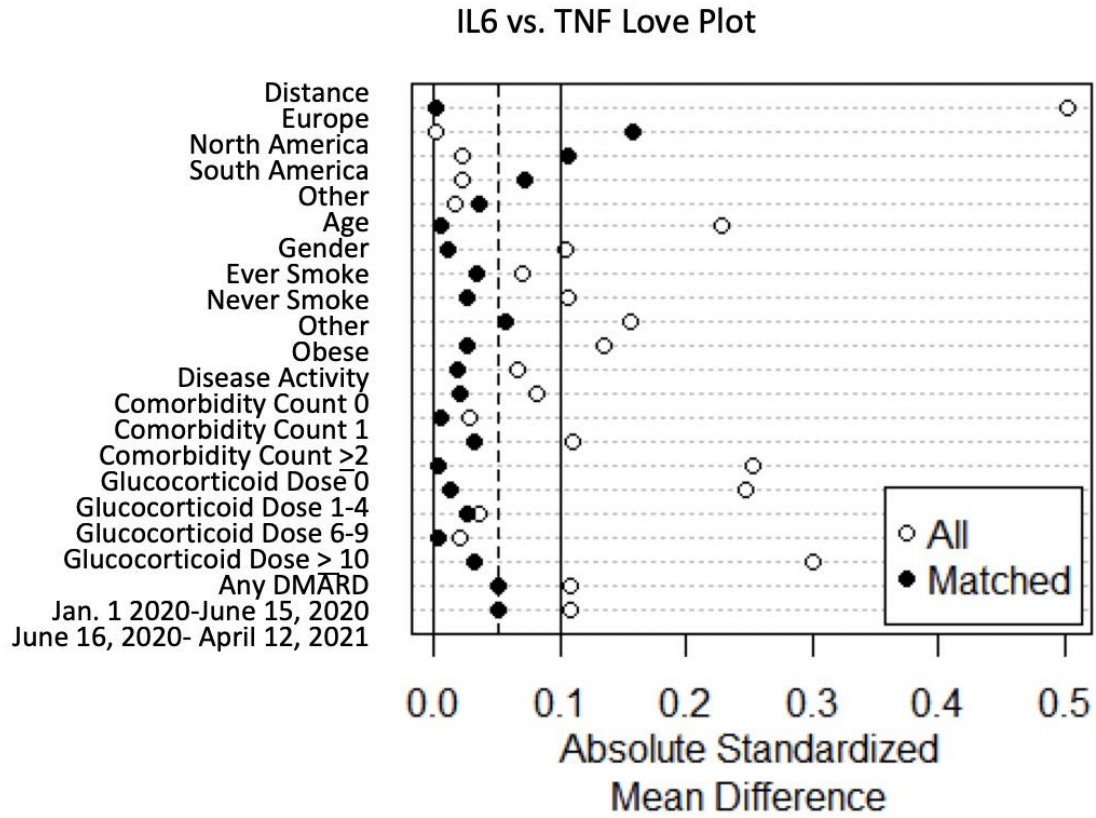

**Supplementary Figure 4:** Love plot for JAK inhibitors vs. TNF inhibitors.

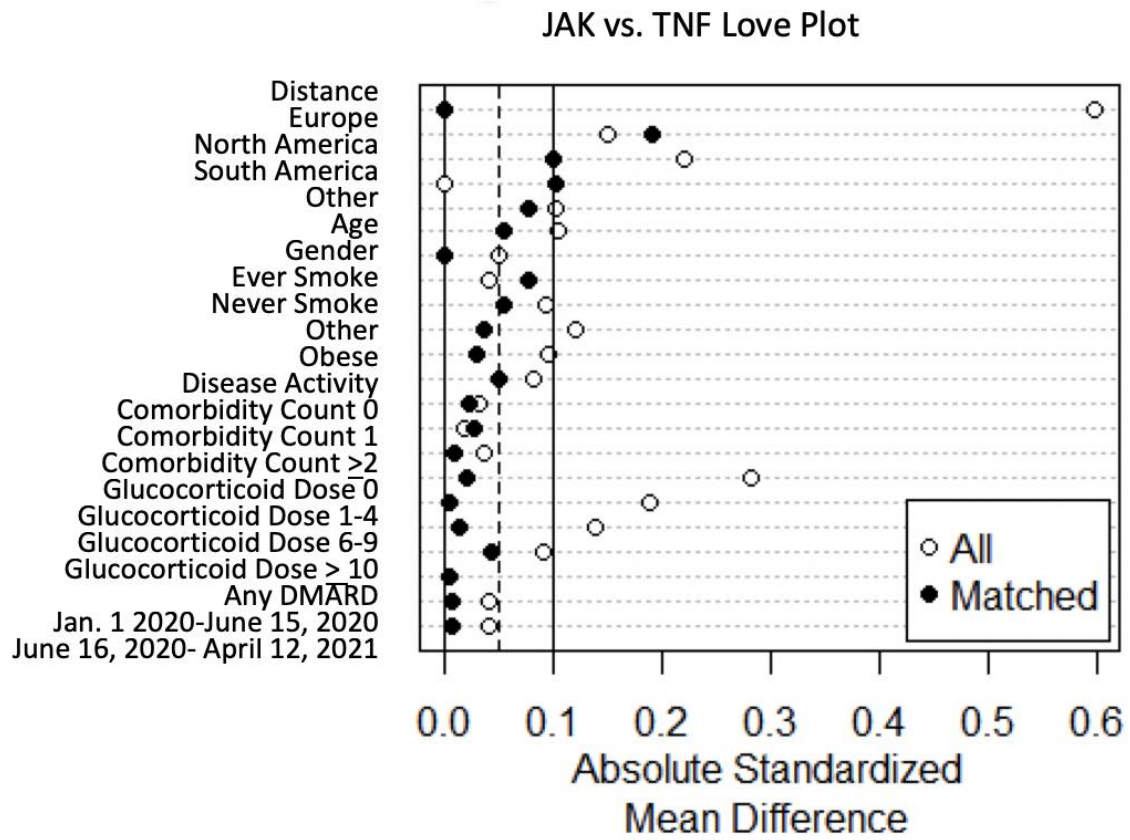

**Supplementary Figure 5:** Flow diagram illustrating analyzed sample for propensity score matching analyses.

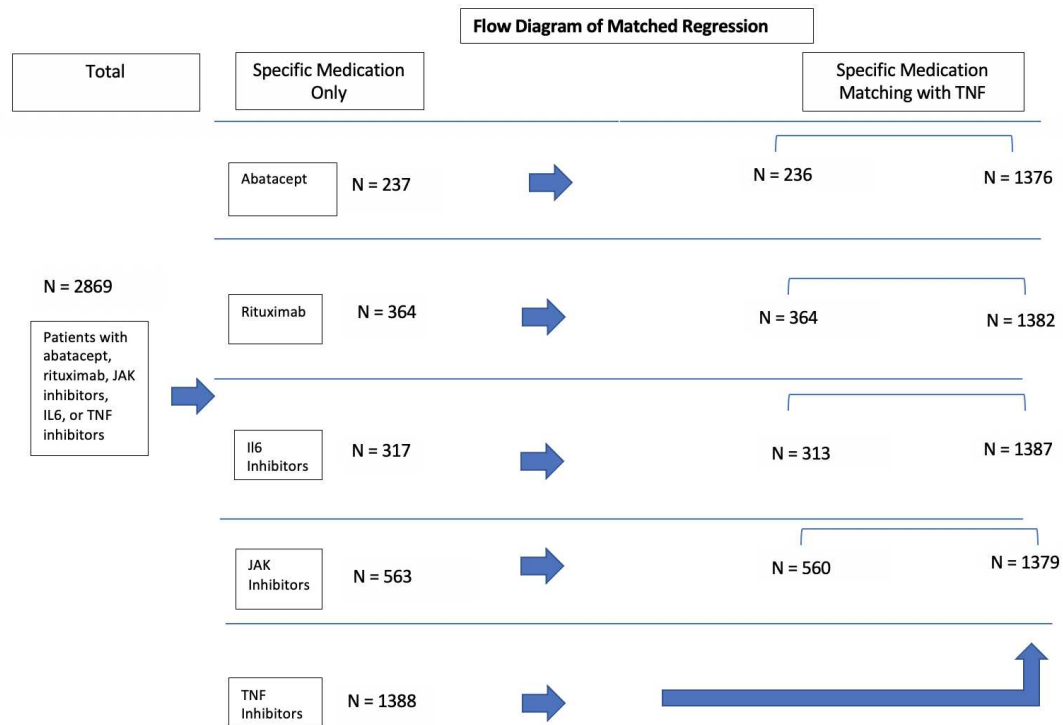

**Supplementary Table 1.** Sensitivity analysis restricting to study period before or after June 16, 2021 and by North America or Europe.

|                                                                        | Abatacept         |         | Rituximab          |         | IL-6 inhibitors   |         | JAK inhibitors    |         | TNF inhibitors |
|------------------------------------------------------------------------|-------------------|---------|--------------------|---------|-------------------|---------|-------------------|---------|----------------|
|                                                                        | OR (95% CI)       | p-value | OR (95% CI)        | p-value | OR (95% CI)       | p-value | OR (95% CI)       | p-value | Ref            |
| <b>Restricted to North America* (January 1, 2020 to June 15, 2020)</b> | 0.94 (0.40, 2.21) | 0.89    | 3.95 (1.93, 8.06)  | <0.01   | 0.59 (0.18, 1.93) | 0.38    | 1.90 (1.06, 3.40) | 0.03    | Ref            |
| <b>Restricted to Europe (January 1, 2020 to June 15, 2020)</b>         | 1.11 (0.55, 2.23) | 0.77    | 5.01 (3.10, 8.09)  | <0.01   | 1.00 (0.52, 1.92) | 0.99    | 1.72 (1.01, 2.94) | 0.05    | Ref            |
| <b>Restricted to Europe (June 16, 2020-April 12, 2021)</b>             | 1.45 (0.50, 4.23) | 0.50    | 7.34 (3.94, 13.65) | <0.01   | 0.28 (0.08, 1.02) | 0.05    | 2.61 (1.41, 4.82) | <0.01   | Ref            |

Adjusted for age, sex, region, obesity, smoking, concomitant csDMARD use, glucocorticoid use/dose, comorbidity count, hypertension/cardiovascular disease, interstitial lung disease, cancer, and rheumatoid arthritis disease activity except as otherwise indicated.

\*There were too few cases to analyze North America June 16, 2020-April 12, 2021.

**Supplementary Table 2.** Frequencies and proportions of outcomes using a revised ordinal COVID-19 severity scale according to baseline use of biologic or targeted synthetic disease-modifying antirheumatic drug for patients with rheumatoid arthritis at time of COVID-19 onset (n=2,869).

| COVID-19 severity scale                                                     | Overall<br>n=2,869 | Abatacept<br>n=237 | Rituximab<br>n=364 | IL-6<br>inhibitors<br>n=317 | JAK<br>inhibitors<br>n=563 | TNF<br>inhibitors<br>n=1388 |
|-----------------------------------------------------------------------------|--------------------|--------------------|--------------------|-----------------------------|----------------------------|-----------------------------|
| 1) Not hospitalized                                                         | 2256<br>(78.6%)    | 181<br>(76.4%)     | 210<br>(57.7%)     | 271<br>(85.5%)              | 409<br>(72.6%)             | 1185<br>(85.4%)             |
| 2) Hospitalized with or without oxygenation (but no mechanical ventilation) | 428<br>(14.9%)     | 36 (11.0%)         | 91 (25.0%)         | 36 (11.4%)                  | 108<br>(19.2%)             | 157<br>(11.3%)              |
| 3) Hospitalized with mechanical ventilation                                 | 28 (1.0%)          | 2 (0.8%)           | 9 (2.5%)           | 1 (0.32%)                   | 6 (1.1%)                   | 10 (0.7%)                   |
| 4) Death                                                                    | 157<br>(5.5%)      | 18 (7.6%)          | 54 (14.8%)         | 9 (2.8%)                    | 40 (7.1%)                  | 36 (2.6%)                   |

**Supplementary Table 3.** Associations of b/tsDMARD use with COVID-19 severity using a revised ordinal outcome scale.

|                                                                       | Abatacept            |         | Rituximab            |         | IL-6 inhibitors      |         | JAK inhibitors       |         | TNF inhibitors |
|-----------------------------------------------------------------------|----------------------|---------|----------------------|---------|----------------------|---------|----------------------|---------|----------------|
|                                                                       | OR (95% CI)          | p-value | Ref            |
| <b>Using different ordinal outcome scale as supplemental analysis</b> |                      |         |                      |         |                      |         |                      |         |                |
| <b>Unadjusted</b>                                                     | 1.87<br>(1.34, 2.61) | 0.25    | 4.50<br>(3.50, 5.79) | <0.01   | 0.99<br>(0.70, 1.40) | 0.96    | 2.23<br>(1.76, 2.82) | <0.01   |                |
| <b>Multivariable Adjusted</b>                                         | 1.24<br>(0.78, 2.19) | 0.36    | 3.60<br>(3.40, 3.80) | <0.01   | 0.83<br>(0.50, 1.37) | 0.46    | 1.59<br>(1.11, 2.28) | 0.01    |                |

Adjusted for age, sex, region, calendar time, obesity, smoking, concomitant csDMARD use, glucocorticoid use/dose, comorbidity count, hypertension/cardiovascular disease, interstitial lung disease, cancer, and rheumatoid arthritis disease activity except as otherwise indicated.



**Supplementary Table 4.** Associations of b/tsDMARD use with COVID-19 severity using a revised ordinal outcome scale.

|                                                              | Abatacept         |         | Rituximab         |         | IL-6 inhibitors   |         | JAK inhibitors    |         | TNF inhibitors |
|--------------------------------------------------------------|-------------------|---------|-------------------|---------|-------------------|---------|-------------------|---------|----------------|
|                                                              | OR (95% CI)       | p-value | Ref            |
| <b>Multivariable adjusted (primary analysis)</b>             | 1.24 (0.78, 2.19) | 0.36    | 3.60 (3.40, 3.80) | <0.01   | 0.83 (0.50, 1.37) | 0.46    | 1.59 (1.11, 2.28) | 0.01    | Ref            |
| <b>Excluding patients with ILD or cancer*</b>                | 1.24 (0.78, 1.96) | 0.36    | 4.15 (2.95, 5.84) | <0.01   | 0.66 (0.40, 1.07) | 0.09    | 1.76 (1.25, 2.47) | <0.01   | Ref            |
| <b>Restricted to US and additionally adjusted for race**</b> | 1.00 (0.48, 2.12) | 0.99    | 3.82 (2.72, 5.37) | <0.01   | 0.66 (0.40, 1.07) | 0.09    | 1.67 (1.19, 2.35) | <0.01   | Ref            |
| <b>Propensity score matched***</b>                           | 1.72 (0.99, 2.98) | 0.051   | 3.36 (2.11, 5.34) | <0.01   | 0.68 (0.35, 1.32) | 0.25    | 1.56 (1.01, 2.42) | 0.049   | Ref            |

Adjusted for age, sex, region, calendar time, obesity, smoking, concomitant csDMARD use, glucocorticoid use/dose, comorbidity count, hypertension/cardiovascular disease, interstitial lung disease, cancer, and rheumatoid arthritis disease activity except as otherwise indicated.

\*n= 2,704 1,563 in the analysis excluding ILD and cancer.

\*\*n=622 868 in the US-only analysis.

\*\*\*n for each pair of propensity-score matched analyses: ABA: 236 TNF: 1376; RTX: 364 TNFi: 1382; IL6i: 313 TNFi: 1387; JAKi: 560 TNFi: 1379

CI, confidence interval; COVID-19, Coronavirus Disease 2019; IL-6, interleukin-6; ILD, interstitial lung disease; JAK, Janus kinase; OR, odds ratio; TNFi, tumor necrosis factor inhibitors.
